# Supplementary material for: Applying a Novel Approach to Scoping Review Incorporating Artificial Intelligence: Mapping the Natural History of Gonorrhoea
Source: Research Square preprint supplement (doi:10.21203/rs.3.rs-128313/v1), 2021-01-14
Supplement: Supplementary file 1 [file 2b34d7054135fc4cd5bd97d6.docx]

## Additional file 4

### Supplementary text 4.1 Full list of health outcomes identified through combined AI and other searches, with references and SIGN score

| **Sex** | **Primary anatomic site infected** | **Final list, complications and health outcomes related to gonorrhea** | **Author** | **Journal** | **Year of publication** | **PMID** | **Study type** | **SIGN Score** |
| --- | --- | --- | --- | --- | --- | --- | --- | --- |
| **Men and / or Women** | Systemic | Disseminated Gonococcal Infection | Ludivico et al. | Arthritis Rheum | 1979 | 153144 | Case series (n=17) | 3 |
| Systemic | Disseminated Gonococcal Infection | Rice et al. | Infect Dis Clin North Am | 2005 | 16297736 | Review | N/A |
| Systemic | Disseminated Gonococcal Infection | Edwards et al. | Clin Microbiol Rev | 2004 | 15489357 | Review | N/A |
| Systemic | Disseminated Gonococcal Infection | Edwards et al. | Crit Rev Microbiol | 2016 | 26805040 | Review | N/A |
| Systemic | Disseminated Gonococcal Infection | Quillin et al. | Nat Rev Microbiol | 2018 | 29430011 | Review | N/A |
| Systemic | Disseminated Gonococcal Infection | Almonacid-Mendoza et al. | Methods Mol Biol | 2019 | 31119630 | Review | N/A |
| Systemic | Fever | McCord et al. | Arch Intern Med | 1977 | 141916 | Retrospective comparative study (n=39) | 2+ |
| Systemic | Leukocytosis | Gelfand et al. | J Rheumatol | 1975 | 1185739 | Case series (n=84) | 3 |
| Systemic | Monoarthritis | Gelfand et al. | J Rheumatol | 1975 | 1185739 | Case series (n=84) | 3 |
| Systemic | Monoarthritis | García-De La Torre et al. | Rheum Dis Clin North Am | 2009 | 19480997 | Review | N/A |
| Systemic | Monoarthritis | Rouanes et al. | Rev Med Interne | 2018 | 28844395 | Case report (n=1) | 3 |
| Systemic | Erythematous Macules | Gelfand et al. | J Rheumatol | 1975 | 1185739 | Case series (n=84) | 3 |
| Systemic | Nonpainful Macules And Papules | García-De La Torre et al. | Rheum Dis Clin North Am | 2009 | 19480997 | Review | N/A |
| Systemic | Gonococcal Arthritis | García-De La Torre et al. | Rheum Dis Clin North Am | 2009 | 19480997 | Review | N/A |
| Systemic | Migratory Arthralgias | McCord et al. | Arch Intern Med | 1977 | 141916 | Retrospective comparative study (n=39) | 2+ |
| Systemic | Osteomyelitis | Almonacid-Mendoza et al. | Methods Mol Biol | 2019 | 31119630 | Review | N/A |
| Systemic | Polyarthritis | Gelfand et al. | J Rheumatol | 1975 | 1185739 | Case series (n=84) | 3 |
| Systemic | Polyarthritis | Rajapakse et al. | Clin Rheumatol | 1984 | 6467867 | Case report (n=1) | 3 |
| Systemic | Popliteal Cyst | Weiner et al. | Sex Transm Dis | 1983 | 6648748 | Case report (n=1) | 3 |
| Systemic | Pustules | Gelfand et al. | J Rheumatol | 1975 | 1185739 | Case series (n=84) | 3 |
| Systemic | Acute Gonococcal Arthritis | McCord et al. | Arch Intern Med | 1977 | 141916 | Retrospective comparative study (n=39) | 2+ |
| Systemic | Septic Arthritis | Terho et al. | Sex Transm Dis | 1977 | 412257 | Case report (n=1) | 3 |
| Systemic | Septic Arthritis | Gelfand et al. | J Rheumatol | 1975 | 1185739 | Case series (n=84) | 3 |
| Systemic | Septic Arthritis | García-De La Torre et al. | Rheum Dis Clin North Am | 2009 | 19480997 | Review | N/A |
| Systemic | Synovial Cyst Rupture | Terho et al. | Sex Transm Dis. | 1977 | 412257 | Case report (n=1) | 3 |
| Systemic | Vesicles | Gelfand et al. | J Rheumatol | 1975 | 1185739 | Case series (n=84) | 3 |
| Systemic | Acute Pericarditis | Wilson et al. | Br Heart J | 1990 | 2317408 | Case report (n=1) | 3 |
| Systemic | Gonococcal-Arthritis Related Mortality | García-De La Torre et al. | Rheum Dis Clin North Am | 2009 | 19480997 | Review | N/A |
| Systemic | Permanent Joint Damage | García-De La Torre et al. | Rheum Dis Clin North Am | 2009 | 19480997 | Review | N/A |
| Systemic | Back Pain | McCord et al. | Arch Intern Med | 1977 | 141916 | Retrospective comparative study (n=39) | 2+ |
| Systemic | Arthritis | O'Brien et al. | Medicine (Baltimore) | 1983 | 6415361 | Case series (n=49) | 3 |
| Systemic | Arthritis-Dermatitis Syndrome | Ludivico et al. | Arthritis Rheum | 1979 | 153144 | Case series (n=17) | 3 |
| Systemic | Arthritis-Dermatitis Syndrome | Edwards et al. | Clin Microbiol Rev | 2004 | 15489357 | Review | N/A |
| Systemic | Rash | Gelfand et al. | J Rheumatol | 1975 | 1185739 | Case series (n=84) | 3 |
| Systemic | Skin Lesions | Ludivico et al. | Arthritis Rheum | 1979 | 153144 | Case series (n=17) | 3 |
| Systemic | Skin Lesions | O'Brien et al. | Medicine (Baltimore) | 1983 | 6415361 | Case series (n=49) | 3 |
| Systemic | Supparative Arthritis | O'Brien et al. | Medicine (Baltimore) | 1983 | 6415361 | Case series (n=49) | 3 |
| Systemic | Synovitis | ICD9/10 | N/A | N/A | N/A | Not applicable | N/A |
| Systemic | Tenosynovitis | Gelfand et al. | J Rheumatol | 1975 | 1185739 | Case series (n=84) | 3 |
| Systemic | Tenosynovitis | O'Brien et al. | Medicine (Baltimore) | 1983 | 6415361 | Case series (n=49) | 3 |
| Systemic | Tenosynovitis | García-De La Torre et al. | Rheum Dis Clin North Am | 2009 | 19480997 | Review | N/A |
| Systemic | Abscess | ICD9/10 | N/A | N/A | N/A | Not applicable | N/A |
| Systemic | Endocarditis (+ Death) | Jackman et al. | Am J Med Sci | 1991 | 2000895 | Case report (n=5, 6 episodes) | 3 |
| Systemic | Endocarditis (+ Death) | Fernandez et al. | Am Heart J | 1984 | 6437201 | Case series (n=4+25 historical cases) | 3 |
| Systemic | Pericardial Effusion | Wilson et al. | Br Heart J. | 1990 | 2317408 | Case report (n=1) | 3 |
| Systemic | Pericarditis + Tamponade | Coe et al. | Arthritis Rheum. | 1990 | 2403406 | Case report (n=1) | 3 |
| Systemic | Meningitis (Primary Infection) | Billings et al. | STD | 1991 | 1907402 | Case report (n=1) | 3 |
| Systemic | Adult Respiratory Distress Syndrome | Belding et al. | Rev Infect Dis. | 1991 | 1775843 | Case report (n=1) | 3 |
| Systemic | Adult Respiratory Distress Syndrome | Almonacid-Mendoza et al. | Methods Mol Biol | 2019 | 31119630 | Review | N/A |
| Systemic | Brain Abscess | ICD9/10 | N/A | N/A | N/A | Not applicable | N/A |
| Systemic | Bursitis | ICD9/10 | N/A | N/A | N/A | Not applicable | N/A |
| Systemic | Cellulitis | ICD9/10 | N/A | N/A | N/A | Not applicable | N/A |
| Systemic | Endocarditis | Edwards et al. | Clin Microbiol Rev | 2004 | 15489357 | Review | N/A |
| Systemic | Endocarditis | Belkacem et al. | Sex Transm Infect. | 2013 | 23920397 | Case series (n=21) | 3 |
| Systemic | Endocarditis | Quillin et al. | Nat Rev Microbiol | 2018 | 29430011 | Review | N/A |
| Systemic | Epidural Abscess | van Hal et al. | Med J Aust. | 2004 | 14709128 | Case report (n=1) | 3 |
| Systemic | Paravertebral Abscess | Low et al. | J Neurosurg Spine | 2012 | 22578237 | Case report (n=1) | 3 |
| Systemic | Glomerularnephritis | Noor et al. | BMJ Case Rep. | 2018 | 30021740 | Case report (n=1) | 3 |
| Systemic | Heart Infection | ICD9/10 | N/A | N/A | N/A | Not applicable | N/A |
| Systemic | Hepatitis | ICD9/10 | N/A | N/A | N/A | Not applicable | N/A |
| Systemic | Infectious Arthritis | Quillin et al. | Nat Rev Microbiol | 2018 | 29430011 | Review | N/A |
| Systemic | Keratosis | ICD9/10 | N/A | N/A | N/A | Not applicable | N/A |
| Systemic | Liver Capsule (Fitzhugh-Curtis Syndrome) | Ndowa et al. | Reprod Health Matters. | 2012 | 23245412 | Review | N/A |
| Systemic | Meningitis | Edwards et al. | Clin Microbiol Rev | 2004 | 15489357 | Review | N/A |
| Systemic | Meningitis | Almonacid-Mendoza et al. | Methods Mol Biol | 2019 | 31119630 | Review | N/A |
| Systemic | Mono / Polyarthralgia | O'Brien et al. | Medicine (Baltimore) | 1983 | 6415361 | Case series (n=49) | 3 |
| Systemic | Ovarian Capsule Hemorrhage | Schneider et al. | Geburtshilfe Frauenheilkd. | 1995 | 7607387 | Case report (n=1) | 3 |
| Systemic | Pericardial Tamponade | Coe et al. | Arthritis Rheum. | 1990 | 2403406 | Case report (n=1) | 3 |
| Systemic | Pericarditis | Coe et al. | Arthritis Rheum. | 1990 | 2403406 | Case report (n=1) | 3 |
| Systemic | Perihepatitis | ICD9/10 | N/A | N/A | N/A | Not applicable | N/A |
| Systemic | Peritoneal Hemorrhage | Schneider et al. | Geburtshilfe Frauenheilkd. | 1995 | 7607387 | Case report (n=1) | 3 |
| Systemic | Peritonitis | ICD9/10 | N/A | N/A | N/A | Not applicable | N/A |
| Systemic | Rhabdomyolysis (Rml) | Attorri et al. | Medicina (B Aires). | 1998 | 10347969 | Case report (n=1) | 3 |
| Systemic | Septic Shock | Almonacid-Mendoza et al. | Methods Mol Biol | 2019 | 31119630 | Review | N/A |
| Systemic | Septicaemia/Sepsis | ICD9/10 | N/A | N/A | N/A | Not applicable | N/A |
| Systemic | Septicaemia/Sepsis | Read Code | N/A | N/A | N/A | Not applicable | N/A |
| Systemic | Spondylitis | ICD9/10 | N/A | N/A | N/A | Not applicable | N/A |
| Systemic | Subcutaneous Abscess | Owino et al. | Br J Vener Dis. | 1981 | 7214122 | Case report (n=1) | 3 |
| Systemic | Vasculitis | Jain et al. | J Clin Path | 2007 | 17213353 | Case report (n=1) | 3 |
| Systemic | Aortic Aneurysm | Risher et al. | Ann Thorac Surg | 1994 | 8147654 | Case report (n=1) | 3 |
| Systemic | Aortitis | Woo et al. | Ann Thorac Surg | 2011 | 21353028 | Case report (n=1) | 3 |
| Systemic | Antibiotic Resistance + Increased Incidence | Chesson et al. | Emerg Infect Dis | 2004 | 24655615 | Trend analysis | 2- |
| Oropharygeal | Mucosal Infection Pharynx | Edwards et al. | Crit Rev Microbiol | 2016 | 26805040 | Review | N/A |
| Oropharygeal | Asymptomatic Pharyngeal Infection | Ndowa et al. | Reprod Health Matters. | 2012 | 23245412 | Review | N/A |
| Oropharygeal | Pharyngitis | Almonacid-Mendoza et al. | Methods Mol Biol | 2019 | 31119630 | Review | N/A |
| Oropharygeal | Gingivitis | Holmstrup et al. | Ann Periodontol | 1999 | 10863372 | Review | N/A |
| Oropharygeal | Gingivitis | Almonacid-Mendoza et al. | Methods Mol Biol | 2019 | 31119630 | Review | N/A |
| Oropharygeal | Intraoral And Cutaneous Abscess Formation | Almonacid-Mendoza et al. | Methods Mol Biol | 2019 | 31119630 | Review | N/A |
| Eye | Anterior Chamber Inflammation | Wan et al. | Am J Ophthalmol | 1986 | 3777076 | Case series (n=21) | 3 |
| Eye | Conjunctivitis | Edwards et al. | Crit Rev Microbiol | 2016 | 26805040 | Review | N/A |
| Eye | Conjunctivitis | Almonacid-Mendoza et al. | Methods Mol Biol | 2019 | 31119630 | Review | N/A |
| Eye | Iridocylitis | ICD9/10 | N/A | N/A | N/A | N/A | N/A |
| Eye | Irritation / Pain | Wan et al. | Am J Ophthalmol | 1986 | 3777076 | Case series (n=21) | 3 |
| Eye | Keratitis | Wan et al. | Am J Ophthalmol | 1986 | 3777076 | Case series (n=21) | 3 |
| Eye | Keratoconjunctivitis | Schwab et al. | Br J Ophthalmol. | 1985 | 4016048 | Outbreak investigation (n=16) | 3 |
| Eye | Periocular Edema And Tenderness, | Wan et al. | Am J Ophthalmol | 1986 | 3777076 | Case series (n=21) | 3 |
| Eye | Preauricular Lymphadenopathy | Wan et al. | Am J Ophthalmol | 1986 | 3777076 | Case series (n=21) | 3 |
| Eye | Purulent Discharge | Wan et al. | Am J Ophthalmol | 1986 | 3777076 | Case series (n=21) | 3 |
| Eye | Neonatal Blindness | Ndowa et al. | Reprod Health Matters. | 2012 | 23245412 | Review | N/A |
| Eye | Visual Acuity Of Light Perception | Wan et al. | Am J Ophthalmol | 1986 | 3777076 | Case series (n=21) | 3 |
| Eye | Corneal Perforation | Kawashima et al. | Eye (Lond). | 2009 | 18064057 | Case report (n=5) | 3 |
| Eye | Endopthalmitis | Quirke et al. | International Journal of Infectious Diseases | 2008 | 18093859 | Case series (n=51) | 3 |
| Eye | Gaze Restriction | Wan et al. | Am J Ophthalmol | 1986 | 3777076 | Case series (n=21) | 3 |
| Co-infection | HIV Infection | Ndowa et al. | Reprod Health Matters. | 2012 | 23245412 | Review | N/A |
| Co-infection | Increased HIV-1 Viral Shedding | Marrazzo et al. | Infect Dis Clin North Am | 2005 | 15963875 | Review | N/A |
| Co-infection | *M. Genitalium / U. Urealyticum.* | Yokoi et al. | CID | 2007 | 17806051 | Cross-sectional study of association (n=390) | 2- |
| Co-infection | Susceptibility To HIV | Edwards et al. | Clin Microbiol Rev | 2004 | 15489357 | Review | N/A |
| Anorectal | Asymptomatic Proctitis | Ghanem et al. | Up to date | 2018 | https://www.uptodate.com/contents/clinical-manifestations-and-diagnosis-of-neisseria-gonorrhoeae-infection-in-adults-and-adolescents | Review | N/A |
| Anorectal | Mucosal Infection Rectum | Edwards et al. | Crit Rev Microbiol | 2016 | 26805040 | Review | N/A |
| Anorectal | Proctitis | Ghanem et al. | Up to date | 2018 | https://www.uptodate.com/contents/clinical-manifestations-and-diagnosis-of-neisseria-gonorrhoeae-infection-in-adults-and-adolescents | Review | N/A |
| Anorectal | Anal Fissures | Travassos et al. | Braz J Infect Dis. | 2016 | 27765581 | Cross-sectional study of association (n=521) | 2- |
| Anorectal | Anovaginal Fistula | Barre et al. | Presse Med | 2018 | 29909937 | Case report (n=1) | 3 |
| Anorectal | Perianal Abscess | El-Dhuwaib et al. | Eur J Clin Microbiol Infect Dis. | 2003 | 12827535 | Case report (n=1) | 3 |
| Psychosocial | Fear Of Loss Of Relationship | Cunningham et al. | Sex Health | 2007 | 17382038 | Qualitative study (n=21 female adolescents) | 3 |
| Psychosocial | Stigmatisation | Cunningham et al. | Sex Health | 2007 | 17382038 | Qualitative study (n=21 female adolescents) | 3 |
| Psychosocial | Lack Of Knowledge About Gonorrhoea | Biro et al. | Clin Pediatr | 1994 | 7813139 | Cross-sectional survey (n=248) | 2- |
| Urogenital | Pelveoperitonitis | Gurlich et al. | Prague Med Rep | 2005 | 16572933 | Case report (n=1) | 3 |
| **Men** | Urogenital | Epididymitis, Acute | Almonacid-Mendoza et al. | Methods Mol Biol | 2019 | 31119630 | Review | N/A |
| Urogenital | Azoospermia | Ndowa et al. | Reprod Health Matters. | 2012 | 23245412 | Review | N/A |
| Urogenital | Infertility (Men) | Han et al. | Andrologia. | 2016 | 26688510 | Cross-sectional study of association in OA patients (n=133) | 2- |
| Urogenital | Obstructive Azoospermia (Oa) | Han et al. | Andrologia. | 2016 | 26688510 | Cross-sectional study of association in OA patients (n=133) | 2- |
| Urogenital | Deferentitis | Kornelishin et al. | Vestn Dermatol Venerol. | 1990 | 2256383 | Case series (n=28) | 3 |
| Urogenital | Epididymo-Orchitis | ICD9/10 | N/A | N/A | N/A | Not applicable | N/A |
| Urogenital | Epididymo-Orchitis | Kornelishin et al. | Vestn Dermatol Venerol. | 1990 | 2256383 | Case series (n=28) | 3 |
| Urogenital | Epididymo-Orchitis | Mensforth et al. | Int J STD AIDS. | 2018 | 28705094 | Prevalence study (EO, n=63) | 3 |
| Urogenital | Epidydimitis, Chronic | Kornelishin et al. | Vestn Dermatol Venerol. | 1990 | 2256383 | Case series (n=28) | 3 |
| Urogenital | Funiculitis | Kornelishin et al. | Vestn Dermatol Venerol. | 1990 | 2256383 | Case series (n=28) | 3 |
| Urogenital | Orchitis | ICD9/10 | N/A | N/A | N/A | Not applicable | N/A |
| Urogenital | Penile Lymphangitis | Almonacid-Mendoza et al. | Methods Mol Biol | 2019 | 31119630 | Review | N/A |
| Urogenital | Periurethral Abscess | Almonacid-Mendoza et al. | Methods Mol Biol | 2019 | 31119630 | Review | N/A |
| Urogenital | Scrotal / Perineal Abscesses | Kleist et al. | Ugeskr Laeger | 1993 | 1462439 | Case series (n=46) | 3 |
| Urogenital | Seminal Vesiculitis | Almonacid-Mendoza et al. | Methods Mol Biol | 2019 | 31119630 | Review | N/A |
| Urogenital | Testicular Abscess +.- Death Of Muscle and Tissue Of Testis | Ndowa et al. | Reprod Health Matters. | 2012 | 23245412 | Review | N/A |
| Urogenital | Acute Prostatitis | Kornelishin et al. | Vestn Dermatol Venerol. | 1990 | 2256383 | Case series (n=28) | 3 |
| Urogenital | Acute Prostatitis | Belkacem et al. | Sex Transm Infect. | 2013 | 23920397 | Case series (n=21) | 3 |
| Urogenital | Acute Prostatitis | Almonacid-Mendoza et al. | Methods Mol Biol | 2019 | 31119630 | Review | N/A |
| Urogenital | Infection Of The Prostate | De Marzo et al. | Prostate | 2017 | 28703328 | Case control study (n=1091) | 2+ |
| Urogenital | Prostatovesiculitis | Kornelishin et al. | Vestn Dermatol Venerol. | 1990 | 2256383 | Case series (n=28) | 3 |
| Urogenital | Prostate Cancer | Heshmat et al. | Urology | 1975 | 1179565 | Case control study (n=150) | 2- |
| Urogenital | Prostate Cancer | Sutcliffe et al. | Cancer Epidemiol Biomarkers Prev | 2006 | 17119041 | Prospective cohort study (n=36033) | 2+ |
| Urogenital | Prostate Cancer | Wang et al. | Eur J Clin Microbiol Infect dis | 2017 | 28013414 | Retrospective cohort study (n=1775) | 2+ |
| Urogenital | Prostatitis | Sutcliffe et al. | Am J Epidemiol | 2005 | 16177142 | Prospective cohort study (n=32932) | 2+ |
| Urogenital | Acute Urethritis | Edwards et al. | Cell Microbiol | 2004 | 11553013 | Review | N/A |
| Urogenital | Asymptomatic Urethral Infection | Ndowa et al. | Reprod Health Matters. | 2012 | 23245412 | Review | N/A |
| Urogenital | Dysuria | Shapiro et al. | Acad Emerg Med | 2005 | 15635136 | Prospective cohort study (n=92) | 2- |
| Urogenital | Dysuria | Almonacid-Mendoza et al. | Methods Mol Biol | 2019 | 31119630 | Review | N/A |
| Urogenital | Haematuria | Amarasuriya et al. | Br J Vener Dis | 1979 | 380776 | Case series (n=50) | 3 |
| Urogenital | Nocturia | Sutcliffe et al. | Am J Epidemiol | 2005 | 16177142 | Prospective cohort study (n=32932) | 2+ |
| Urogenital | Urethral Discharge | Matteelli et al. | STI | 2000 | 10858716 | Syndromic surveillance report | 3 |
| Urogenital | Urethral Discharge | Almonacid-Mendoza et al. | Methods Mol Biol | 2019 | 31119630 | Review | N/A |
| Urogenital | Urethritis In Men | Ludivico et al. | Arthritis Rheum | 1979 | 153144 | Case series (n=17) | 3 |
| Urogenital | Urethritis In Men | Terho et al. | Sex Transm Dis. | 1977 | 412257 | Case report (n=1) | 3 |
| Urogenital | Urethritis In Men | Shaughnessy et al. | Methods Mol Biol | 2019 | 31119614 | Review | N/A |
| Urogenital | Chronic Urethritis | Read Code | N/A | N/A | N/A | Not applicable | N/A |
| Urogenital | Reduced Renal Function | Kleist et al. | Ugeskr Laeger | 1992 | 1462439 | Case series (n=46) | 3 |
| Urogenital | Urethral Fistulae | Osoba et al. | Br J Vener Dis | 1976 | 1009418 | Case series (n=16) | 3 |
| Urogenital | Urethral Stricture | Kleist et al. | Ugeskr Laeger | 1994 | 1462439 | Case series (n=46) | 3 |
| Co-infection | HIV In Men | Beck et al. | Int J STD AIDS | 1996 | 8652708 | Case control study (n=1168 men) | 2- |
| Co-infection | HIV In MSM | Beymer et al. | J Acquir Immune Defic Syndr | 2016 | 27163174 | Prospective cohort study (n=3111) | 2- |
| Co-infection | HIV In MSM | Barbee et al. | STD | 2017 | 28608786 | Case control study (n=880) | 2- |
| **Women** | Urogenital | Invasive Vulval Carcinoma | Sherman et al. | Epidemiology | 1991 | 1655066 | Case-control study (n=646) | 2- |
| Urogenital | Vulval Carcinoma In Situ | Sherman et al. | Epidemiology | 1991 | 1655066 | Case-control study (n=646) | 2- |
| Urogenital | Cervical Carcinoma | Sandmire et al. | Obstet Gynecol | 1976 | 934574 | Laboratory surveillance study (n=40,000) | 3 |
| Urogenital | Cervical Intraepithelial Neoplasia Grade Iii | Johansen et al. | Acta Obstet Gynecol Scand | 2001 | 11531621 | Registry data (n=4440) | 2- |
| Urogenital | Invasive Cervical Cancer | de Sanjose et al. | Int J Cancer. | 1994 | 8314322 | Case-control study (n=1037) | 2+ |
| Urogenital | Chronic Endometritis | Laniewski et al. | Methods Mol Biol | 2019 | 31119633 | Review | 2+ |
| Urogenital | Chronic Pelvic Pain | Shaughnessy et al. | Methods Mol Biol | 2019 | 31119614 | Review | N/A |
| Urogenital | Ectopic Pregnancy | Kallenberger et al. | South Med J. | 1978 | 663716 | Case series (n=160) | 3 |
| Urogenital | Ectopic Pregnancy | Ankum et al. | Fertil Steril. | 1996 | 8641479 | Meta-analysis (4 case-control studies) | 1- |
| Urogenital | Ectopic Pregnancy | Edwards et al. | Cell Microbiol | 2004 | 11553013 | Review | N/A |
| Urogenital | Ectopic Pregnancy | Moore et al. | STD | 2016 | 26656441 | Trend analysis | 2- |
| Urogenital | Ectopic Pregnancy | Quillin et al. | Nat Rev Microbiol | 2018 | 29430011 | Review | N/A |
| Urogenital | Ectopic Pregnancy | Shaughnessy et al. | Methods Mol Biol | 2019 | 31119614 | Review | N/A |
| Urogenital | Infertility (Women) | Edwards et al. | Cell Microbiol | 2004 | 11553013 | Review | N/A |
| Urogenital | Infertility (Women) | Edwards et al. | Clin Microbiol Rev | 2004 | 15489357 | Review | N/A |
| Urogenital | Infertility (Women) | Morales et al. | Infect Immun | 2006 | 16714596 | Review | N/A |
| Urogenital | Infertility (Women) | Tsevat et al. | Am J Obstet Gynecol | 2017 | 28007229 | Review | N/A |
| Urogenital | Infertility (Women) | Quillin et al. | Nat Rev Microbiol | 2018 | 29430011 | Review | N/A |
| Urogenital | Intra-abdominal Adhesions & Chronic Pelvic Pain | Lenz et al. | Front Immunol | 2018 | 30524442 | Review | N/A |
| Urogenital | Occlusion Of The Oviduct | Lenz et al. | Front Immunol | 2018 | 30524442 | Review | N/A |
| Urogenital | Tubal Factor Infertility | Lenz et al. | Front Immunol | 2018 | 30524442 | Review | N/A |
| Urogenital | Tubal Factor Infertility | Shaughnessy et al. | Methods Mol Biol | 2019 | 31119614 | Review | N/A |
| Urogenital | Tubal Infertililty | Grodstein et al. | Am J Epidemiology | 1993 | 8465809 | Case-control study (n=4116) | 2- |
| Urogenital | Tubal Infertility | Sherman et al. | STD | 1987 | 3563829 | Case control study (n=979) | 2- |
| Urogenital | Tubal Scarring | Edwards et al. | Clin Microbiol Rev | 2004 | 15489357 | Review | N/A |
| Urogenital | Tubal Scarring | Lenz et al. | Front Immunol | 2018 | 30524442 | Review | N/A |
| Urogenital | Tubo-Ovarian Abscess | Miller et al. | Am Fam Physician | 2006 | 16734055 | Review | N/A |
| Urogenital | Tubal Infertililty | Cates et al. | Am J Obstet Gynecol | 1993 | 8362945 | Case-control study (n=1912) | 2- |
| Urogenital | Acute Perihepatitis (Fitz-Hugh–Curtis Syndrome) | Almonacid-Mendoza et al. | Methods Mol Biol | 2019 | 31119630 | Review | N/A |
| Urogenital | Cervicitis (Mucopurulent) | Morales et al. | Infect Immun | 2006 | 16714596 | Review | N/A |
| Urogenital | Co-Infection (Chlamydia) | Seigel et al. | J Adolesc Health. | 1995 | 7742335 | Laboratory surveillance study (n=1990) | 2- |
| Urogenital | Disseminated Gonococcal Infection in Pregnancy | Phupong et al. | Arch Gynecol Obstet | 2005 | 16136359 | Case report (n=1) | 3 |
| Urogenital | Ectopic Pregnancy | Edwards et al. | Clin Microbiol Rev | 2004 | 15489357 | Review | N/A |
| Urogenital | Ectopic Pregnancy | Lenz et al. | Front Immunol | 2018 | 30524442 | Review | N/A |
| Urogenital | Endocarditis | Almonacid-Mendoza et al. | Methods Mol Biol | 2019 | 31119630 | Review | N/A |
| Urogenital | Endocervical Mucopus | Chandeying et al. | STI | 1998 | 9849555 | Prospective study: clinical protocol evaluation, non-random allocation (n=240) | 2- |
| Urogenital | Endocervicitis | Kornelishin et al. | Vestn Dermatol Venerol. | 1990 | 2256383 | Case series (n=28) | 3 |
| Urogenital | Endometritis | Kornelishin et al. | Vestn Dermatol Venerol. | 1990 | 2256383 | Case series (n=28) | 3 |
| Urogenital | Endometritis | Timmerman et al. | Cell Microbiol | 2005 | 15839892 | Review | N/A |
| Urogenital | Endometritis | Morales et al. | Infect Immun | 2006 | 16714596 | Review | N/A |
| Urogenital | Endometritis | Shaughnessy et al. | Methods Mol Biol | 2019 | 31119614 | Review | N/A |
| Urogenital | Endometritis | Almonacid-Mendoza et al. | Methods Mol Biol | 2019 | 31119630 | Review | N/A |
| Urogenital | Endometritis + Salpingitis | Plummer et al. | J Infect Dis | 1987 | 3598229 | Prospective cohort study (n=1,013) | 2- |
| Urogenital | Endomyometritis | Kornelishin et al. | Vestn Dermatol Venerol. | 1990 | 2256383 | Case series (n=28) | 3 |
| Urogenital | Fallopian Tubal Abscess | Morales et al. | Infect Immun | 2006 | 16714596 | Review | N/A |
| Urogenital | Fallopian Tube Salpingitis | Almonacid-Mendoza et al. | Methods Mol Biol | 2019 | 31119630 | Review | N/A |
| Urogenital | Gonococcal Urethritis | Edwards et al. | Clin Microbiol Rev | 2004 | 15489357 | Review | N/A |
| Urogenital | Pelvic (Tubal Or Ovarian) Peritonitis | Morales et al. | Infect Immun | 2006 | 16714596 | Review | N/A |
| Urogenital | Pelvic Inflammatory Disease | Laniewski et al. | Methods Mol Biol | 2019 | 31119633 | Review | N/A |
| Urogenital | Pelvic Inflammatory Disease | Edwards et al. | Clin Microbiol Rev | 2004 | 15489357 | Review | N/A |
| Urogenital | Pelvic Inflammatory Disease | Kamwendo et al. | Sex Transm Dis. | 1996 | 8885069 | Trend analysis | 2- |
| Urogenital | Pelvic Inflammatory Disease | Edwards et al. | Cell Microbiol | 2004 | 11553013 | Review | N/A |
| Urogenital | Pelvic Inflammatory Disease | Morales et al. | Infect Immun | 2006 | 16714596 | Review | N/A |
| Urogenital | Pelvic Inflammatory Disease | Moore et al. | STD | 2016 | 26656441 | Trend analysis | 2- |
| Urogenital | Pelvic Inflammatory Disease | Reekie et al. | Clin Infect Dis | 2018 | 29136127 | Retrospective cohort study (3199135) | 2+ |
| Urogenital | Pelvic Inflammatory Disease | Quillin et al. | Nat Rev Microbiol | 2018 | 29430011 | Review | N/A |
| Urogenital | Pelvic Inflammatory Disease | Lenz et al. | Front Immunol | 2018 | 30524442 | Review | N/A |
| Urogenital | Pelvic Inflammatory Disease | Shaughnessy et al. | Methods Mol Biol | 2019 | 31119614 | Review | N/A |
| Urogenital | Pelvic Inflammatory Disease | Almonacid-Mendoza et al. | Methods Mol Biol | 2019 | 31119630 | Review | N/A |
| Urogenital | Salpingitis | Soper et al. | Am J Obstet Gynaecol | 1992 | 1530018 | Cross-sectional study (n=36) | 3 |
| Urogenital | Salpingitis | Morales et al. | Infect Immun | 2006 | 16714596 | Review | N/A |
| Urogenital | Salpingitis | Shaughnessy et al. | Methods Mol Biol | 2019 | 31119614 | Review | N/A |
| Urogenital | Salpingitis +/- Endometritis | Plummer et al. | J Infect Dis | 1987 | 3598229 | Prospective cohort study (n=1,013) | 2- |
| Urogenital | Severe Hemorrhage Post Ectopic Pregnancy | Shaughnessy et al. | Methods Mol Biol | 2019 | 31119614 | Review | N/A |
| Urogenital | Adverse Pregnancy Outcomes | Edwards et al. | Crit Rev Microbiol | 2016 | 26805040 | Review | N/A |
| Urogenital | Fetal Wastage | Edwards et al. | Crit Rev Microbiol | 2016 | 26805040 | Review | N/A |
| Urogenital | Infant Death | Warr et al. | Sex Transm Infect | 2019 | 30228109 | Nested longitudinal analysis (n=1221) | 2- |
| Urogenital | Low Birth Weight | Heumann et al. | Sex Transm Dis | 2017 | 28407641 | Retrospective cohort study (n=819) | 2- |
| Urogenital | Miscarriage | Campbell et al. | Aust N Z J Public Health | 2011 | 21806729 | Retrospective cohort study (n=961) | 2+ |
| Urogenital | Premature Rupture Of Membranes | Amstey et al. | J Am Vener Dis Assoc | 1976 | 1010761 | Retrospective cohort study (n=5065) | 2- |
| Urogenital | Premature Rupture Of Membranes | Woods et al. | Semin Pediatr Infect Dis | 2005 | 16210106 | Review | N/A |
| Urogenital | Preterm Delivery | Woods et al. | Semin Pediatr Infect Dis | 2005 | 16210106 | Review | N/A |
| Urogenital | Preterm Delivery | Liu et al. | Sex Transm Infect | 2013 | 24005255 | Retrospective cohort study (n=354217) | 2+ |
| Urogenital | Preterm Delivery | Waight et al. | J La State Med Soc | 2013 | 24133786 | Database study (surveillance data) | 2+ |
| Urogenital | Preterm Delivery | Shaughnessy et al. | Methods Mol Biol | 2019 | 31119614 | Review | N/A |
| Urogenital | Preterm Delivery | Mann et al. | J Maternal-fetal & Neonatal Medicine | 2010 | 19903113 | Cohort study (n=108346) | 2- |
| Urogenital | Prolonged Rupture Of Membranes | Amstey et al. | J Am Vener Dis Assoc | 1976 | 1010761 | Retrospective cohort study (n=5065) | 2- |
| Urogenital | Prolonged Rupture Of Membranes | Ekwo et al. | Int J Epidemiol | 1993 | 8359967 | Case-control study (n=368) | 2- |
| Urogenital | Septic Abortion | Woods et al. | Semin Pediatr Infect Dis | 2005 | 16210106 | Review | N/A |
| Urogenital | Small For Gestational Age | Heumann et al. | Sex Transm Dis | 2017 | 28407641 | Retrospective cohort study (n=819) | 2- |
| Urogenital | Small For Gestational Age | Reekie et al. | Lancet Infect Dis | 2018 | 29371067 | Retrospective cohort study (3199135) | 2- |
| Urogenital | Stillbirth | Liu et al. | Sex Transm Infect | 2013 | 24005255 | Retrospective cohort study (n=354217) | 2+ |
| Urogenital | Stillbirth | Moodley et al. | Sex Transm Infect | 2017 | 28396556 | Retrospective observational study (n=615) | 2- |
| Urogenital | Cystitis | ICD9/10 | N/A | N/A | N/A | Not applicable | N/A |
| Urogenital | Urgency | Shapiro et al. | Acad Emerg Med | 2005 | 15635136 | Prospective cohort study (n=92) | 2- |
| Urogenital | Urinary Frequency | Shapiro et al. | Acad Emerg Med | 2005 | 15635136 | Prospective cohort study (n=92) | 2- |
| Urogenital | Asymptomatic Cervicitis | Suzuki et al. | PLoS One | 2019 | 30730922 | Prevalence study (n=281 institutes) | 3 |
| Urogenital | Cervicitis, Acute | Edwards et al. | Clin Microbiol Rev | 2004 | 15489357 | Review | N/A |
| Urogenital | Cervicitis, Acute | Shaughnessy et al. | Methods Mol Biol | 2019 | 31119614 | Review | N/A |
| Urogenital | Cervicitis, Acute | Almonacid-Mendoza et al. | Methods Mol Biol | 2019 | 31119630 | Review | N/A |
| Urogenital | Mucopurulent Cervicitis | Marrazzo et al. | Infect Dis Clin North Am | 2005 | 15963875 | Review | N/A |
| Urogenital | Vaginal Discharge | Matteelli et al. | STI | 2000 | 10858716 | Syndromic surveillance report | 3 |
| Urogenital | Vulvovaginitis | ICD9/10 | N/A | N/A | N/A | Not applicable | N/A |
| Urogenital | Cervicitis, Chronic | ICD9/10 | N/A | N/A | N/A | Not applicable | N/A |
| Urogenital | Bartholin'S Abscess | Bleker et al. | Genitourin Med | 1990 | 2107139 | Case series (n=5) | 3 |
| Urogenital | Bartholin'S Cyst | Bleker et al. | Genitourin Med | 1990 | 2107139 | Case series (n=5) | 3 |
| Urogenital | Bartholin'S Disorder | Bleker et al. | Genitourin Med | 1990 | 2107139 | Case series (n=5) | 3 |
| Urogenital | Bartholonitis/Bartholin’S Gland Abscess | Ghanem et al. | Up to date | 2018 | N/A | Review | N/A |
| Urogenital | Dyspareunia | Moran et al. | BMJ Clin Evid | 2007 | 19454057 | Systematic review (21 systematic review, RCTs or observational studies included) | 2++ |
| Co-infection | HIV In Women | Laga et al. | AIDS | 1993 | 8442924 | Nested case-control study (n=431) | 2- |
| Co-infection | HIV In Women | Peterman et al. | Int J STD AIDS | 2015 | 24713228 | Retrospective cohort using surveillance data | 2- |
| Co-infection | HIV In Women | Newman et al. | Clin Infect Dis. | 2019 | 30976788 | Retrospective cohort using registry data | 2- |
| Co-infection | HIV In Women | Beck et al. | Int J STD AIDS | 1996 | 8652708 | Case control study (n=105 women) | 2- |
| Co-infection | Bactervial Vaginosis | Gallo et al. | Ann Epidemiol | 2012 | 22192490 | Prospective cohort study (n=645) | 2- |
| Co-infection | Co-Infection (Chlaymdia) | Siegel et al. | J Adolesc Health | 1995 | 7742335 | Laboratory surveillance study (n=1990) | 2- |
| **Newborn** | Neonatal infection | Gonococcal Colonization Of The Oropharynx +/- Gastric Fluid | Woods et al. | Semin Pediatr Infect Dis | 2005 | 16210106 | Review | N/A |
| Neonatal infection | Gonococcal Ophthalmia Neonatorum | Lepage et al. | J Antimicrob Chemother | 1990 | 2228841 | Case series (n=21) | 3 |
| Neonatal infection | Gonococcal Ophthalmia Neonatorum | Laga et al. | Lancet | 1986 | 2877285 | Prospective cohort study (n=1,019) | 2+ |
| Neonatal infection | Gonococcal Ophthalmia Neonatorum | Woods et al. | Semin Pediatr Infect Dis | 2005 | 16210106 | Review | N/A |
| Neonatal infection | Gonococcal Ophthalmia Neonatorum | Edwards et al. | Crit Rev Microbiol | 2016 | 26805040 | Review | N/A |
| Neonatal infection | Gonococcal Ophthalmia Neonatorum | Almonacid-Mendoza et al. | Methods Mol Biol | 2019 | 31119630 | Review | N/A |
| Neonatal infection | Neonatal Inflammation Of Mucosal Membranes | Woods et al. | Semin Pediatr Infect Dis | 2005 | 16210106 | Review | N/A |
| Neonatal infection | Scalp Abscesses | Woods et al. | Semin Pediatr Infect Dis | 2005 | 16210106 | Review | N/A |
| Neonatal infection | Wound Infections | Woods et al. | Semin Pediatr Infect Dis | 2005 | 16210106 | Review | N/A |
| Neonatal infection | Neonatal Blindness | Quillin et al. | Nat Rev Microbiol | 2018 | 29430011 | Review | N/A |
| Neonatal infection | Systemic Disease (Sepsis, Meningitis) | Woods et al. | Semin Pediatr Infect Dis | 2005 | 16210106 | Review | N/A |

AI, artificial intelligence; ICD 9/10, International Statistical Classification of Diseases and Related Health Problems (Ninth or Tenth Revision); SIGN, Scottish Intercollegiate Guidelines Network; PMID, Pubmed identification number
